# Supplementary material for: Enhanced energy storage efficiency with NbSnMoS2 nanosheets as electrode material in hybrid supercapacitor devices
Source: Royal Society of Chemistry journal article supplement (doi:10.1039/d3nj05383k), 2024-01-01
Supplement: d3nj05383k1.pdf [file d3nj05383k1.pdf]

## Supporting Information

### Enhanced Energy Storage Efficiency with NbSnMoS<sub>2</sub> Nanosheets as Electrode Material in Hybrid Supercapacitor Devices

Vediyappan Thirumal <sup>a</sup>, Sankaiya Asaithambi <sup>b</sup>, Palanisamy Rajkumar <sup>a</sup>, Bathula Babu <sup>a</sup>,  
Kisoo Yoo <sup>a,\*</sup>, Jinho Kim <sup>a,\*</sup>

<sup>a</sup> Department of Mechanical Engineering, Yeungnam University, Gyeongsan-si, Gyeongbuk-do 38541,  
Republic of Korea.

<sup>b</sup> Nanotechnology & Advanced Materials Engineering, Sejong University, 209 Neungdong-ro, Gwangjin-gu,  
Seoul, 143-747, Republic of Korea.

\*E-mail: [jinho@ynu.ac.kr](mailto:jinho@ynu.ac.kr) (JK); [kisooyoo@yu.ac.kr](mailto:kisooyoo@yu.ac.kr) (KY)

The FE-SEM surface morphologies with energy dispersive spectroscopy (EDS) technique provide valuable insights into the spatial arrangement of each element, contributing to a comprehensive understanding of the material's chemical composition. Figures S1, S2, and S3 illustrate the insights gained from the EDS technique regarding the compositional homogeneity of NbMoS<sub>2</sub>, SnMoS<sub>2</sub>, and NbSnMoS<sub>2</sub>, respectively. The elements present in NbMoS<sub>2</sub> include Nb, Mo, and S; in SnMoS<sub>2</sub>, the elements are Sn, Mo, and S; and in NbSnMoS<sub>2</sub>, the elements are Nb, Sn, Mo, and S, as confirmed in Figures S1, S2, and S3. Additionally, EDS mapping validates the homogeneous distribution of all elements.

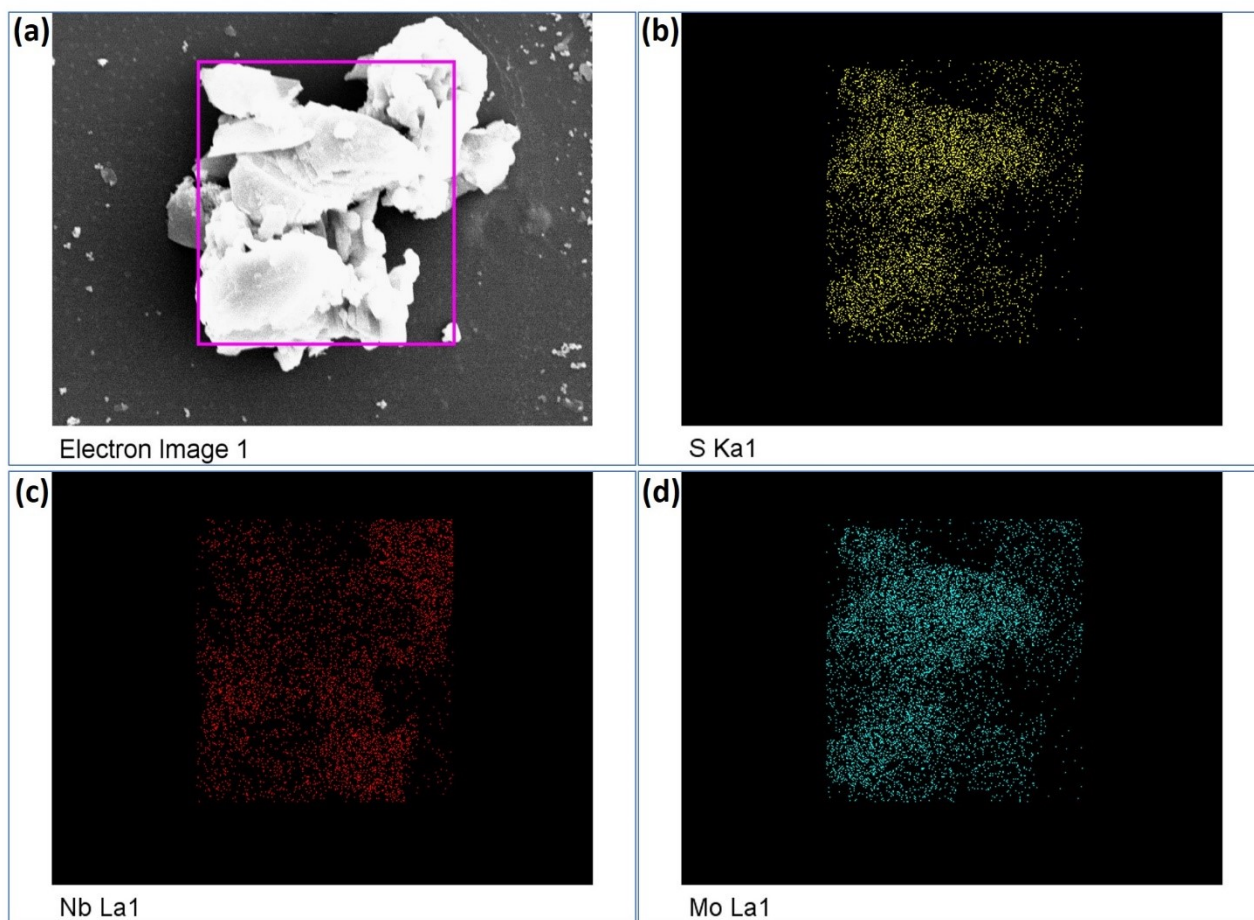

**Figure S1. (a) FE-SEM surface images and (b-d) EDS elemental dot mapping images of the NbMoS<sub>2</sub>.**

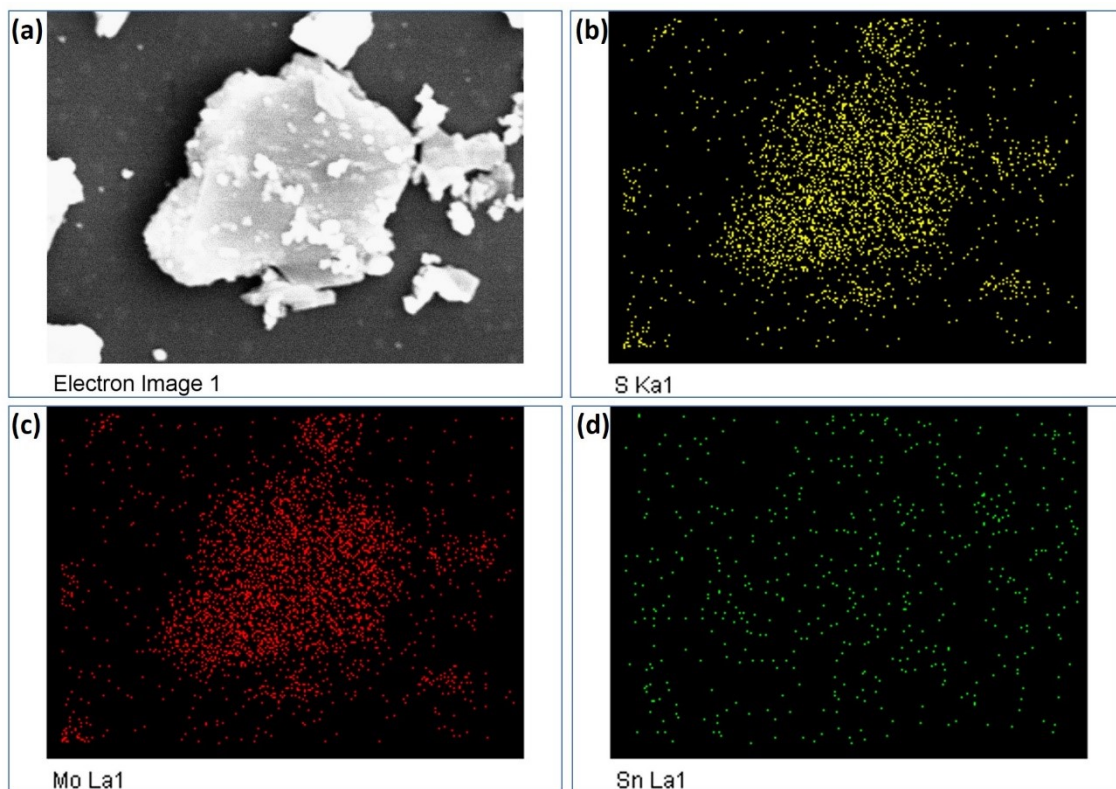

**Figure S2. (a) FE-SEM surface images and (b-d) EDS elemental dot mapping images of the SnMoS<sub>2</sub>.**

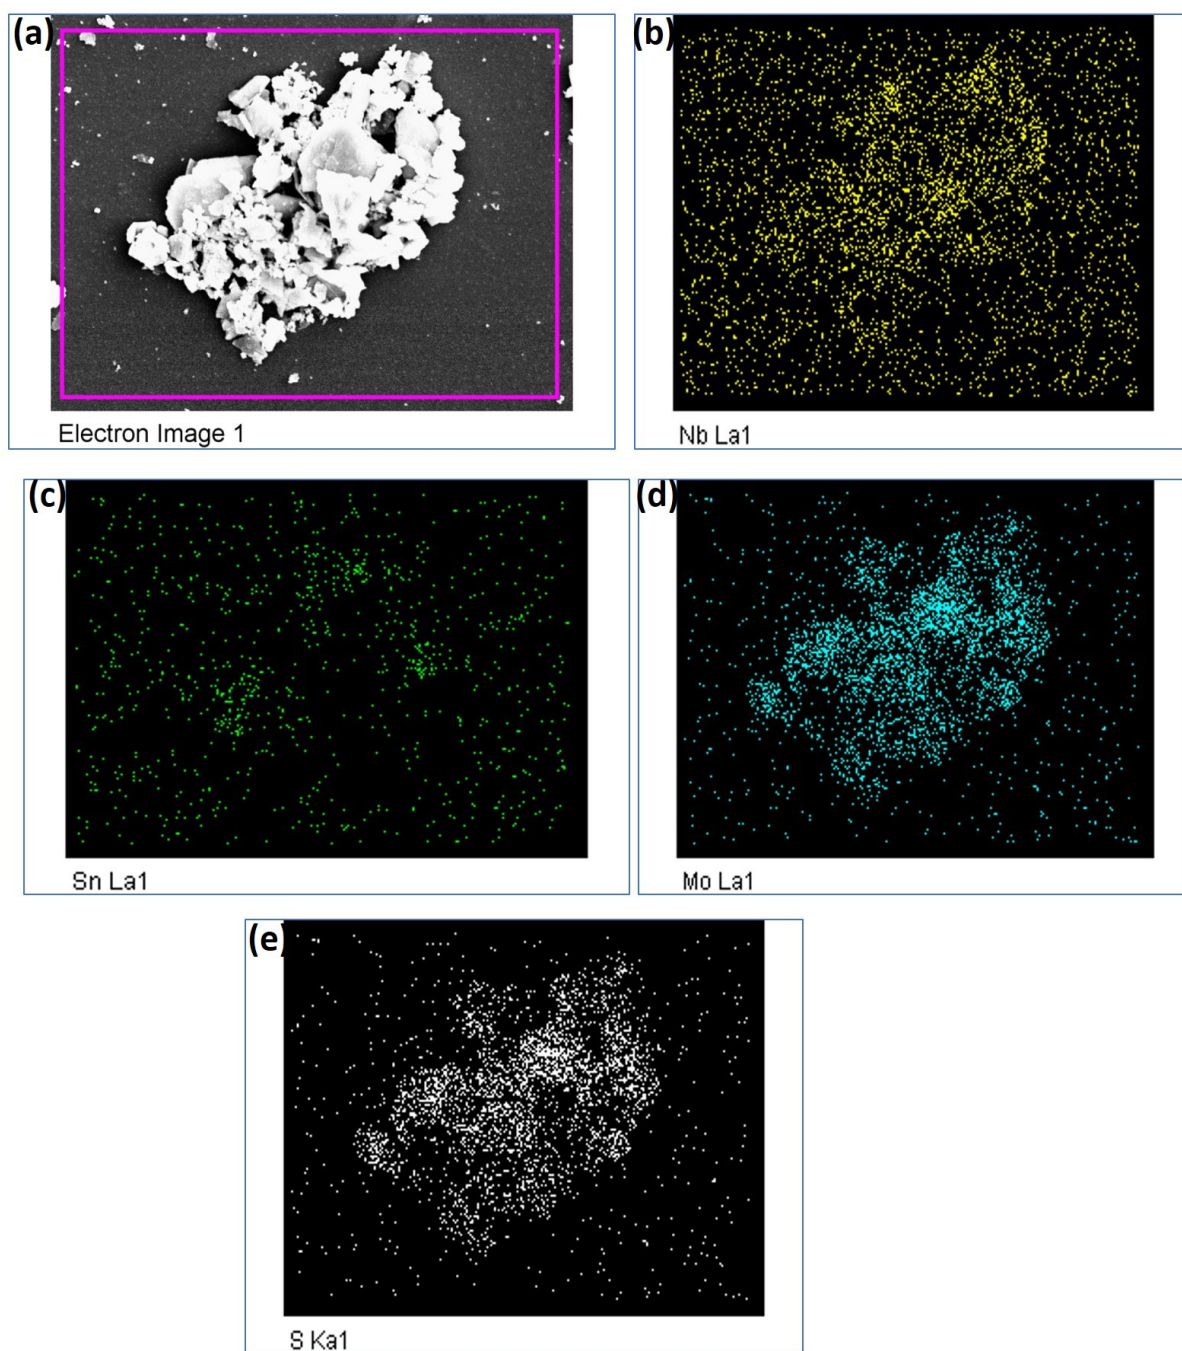

**Figure S3. (a) FE-SEM surface images and (b-d) EDS elemental dot mapping images of the NbSnMoS<sub>2</sub>.**

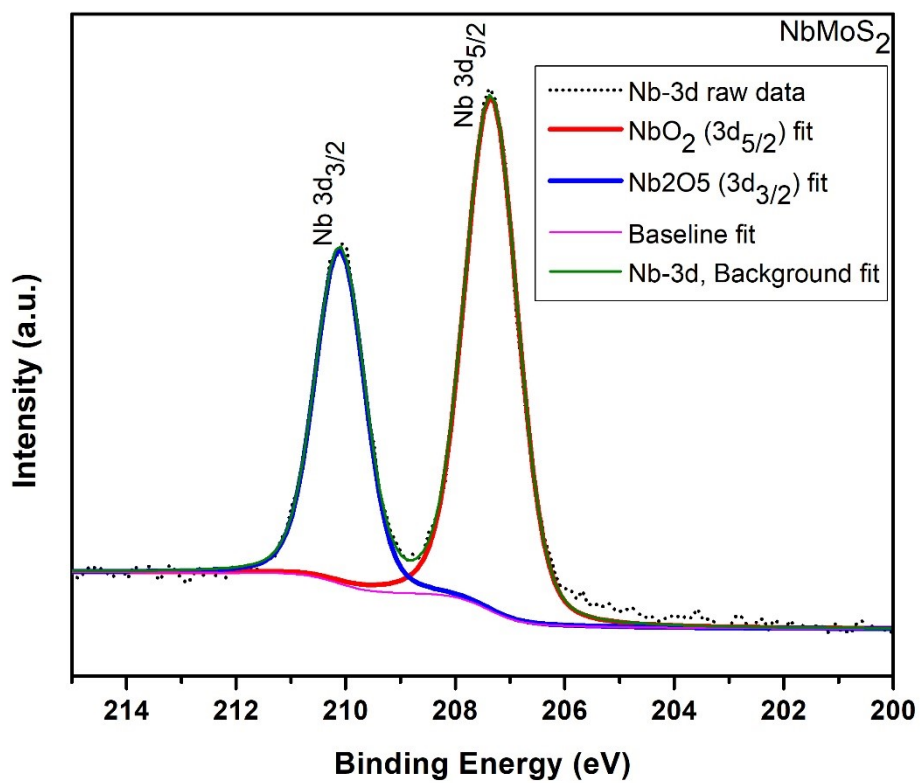

**Figure S4.** The XPS spectra of the niobium Nb3d peak for NbMoS<sub>2</sub> and deconvoluted the XPS peaks fitting of Nb3d core level 3d<sub>3/2</sub>, 3d<sub>5/2</sub>.

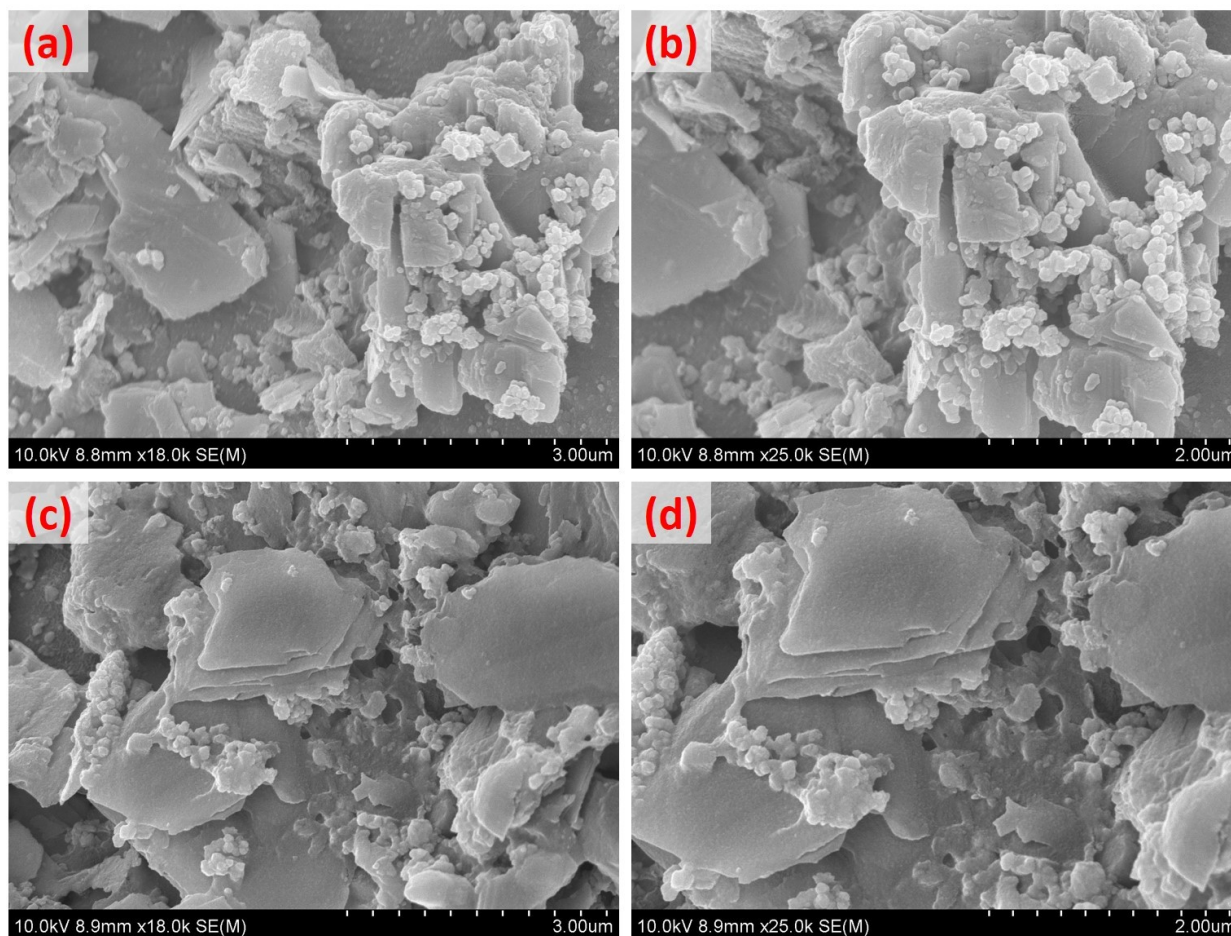

**Figure S5. (a-d) FE-SEM surface morphologies images of NbSnMoS<sub>2</sub> electrodes, (a & b) morphology of the electrode surface before and (c & d) after cycling stability images.**

Figure S5 (a-d) depicts the morphological changes in the NbSnMoS<sub>2</sub> electrode before and after cycling. As-prepared fresh electrodes with active materials (Figures S5(c,d)) is evident that the MoS nanosheets and metal oxide spherical nanoparticles are distinctly connected with the binder particles and activated carbon used in electrode fabrication. Moreover, Figures S5(c,d) reveal the infiltration of KOH electrolyte into the sample, resulting in a clustered appearance in the FESEM studies after cycling surface morphologies. Furthermore, the FESEM images post-cycling exhibit the same morphology as the pre-cycling stage, affirming the enhanced stability of the prepared electrode active materials.

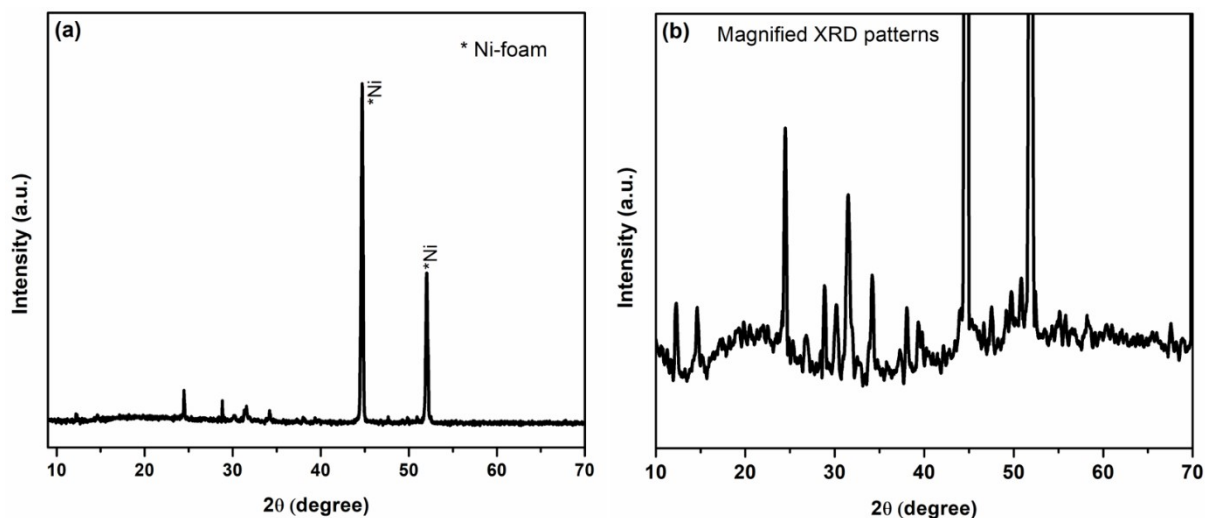

**Figure S6. (a) XRD pattern of NbSnMoS<sub>2</sub> electrode and (b) magnified view XRD crystalline pattern**

Figure S6 shows the after cycling XRD pattern of the NbSnMoS<sub>2</sub> electrode. The XRD pattern exhibits NbSnMoS<sub>2</sub> sample XRD peaks with high intense Ni peaks. Because the Ni foam was used as substrate. This results further confirms the stability of the NbSnMoS<sub>2</sub> electrode.
